# Supplementary material
Source: publisher site journal article supplement (http://www.sagepub.com/logiostudy/SupplementalReadings/Part_III%20Quizzes%20and%20Projects.doc)
Supplement: Supplementary file 1 [file Part_III%20Quizzes%20and%20Projects.doc]

**Part IIIa**

**REVIEW QUIZ**

NAME______________________________________
INSTRUCTOR_______________________________
DATE______________________________________

(1) The **GSS** has seven (7) different variables asking about abortion. The best way to explore the relationship between attitudes toward abor­tion and other variables is to create for abortion attitudes.

(2) According to the summary table in this supplemental material, the idea that men are much less likely to support abortion is .

(3) To examine the relationship between age and attitudes toward abor­tion, we should age if we want to use crosstabulation.

(4) In question #3, AGE starts out with a level of measure­ment. In order to use it in a crosstabulation we change it to have a level of measurement.

(5) The level of measurement for abortion attitudes in the case when the woman’s health is threatened is _____________________.

**Part IIIa**

**INDEPENDENT PROJECT**

NAME_________________________________________
INSTRUCTOR___________________________________
DATE__________________________________________

**Hypothesis A states: Those who oppose capital punishment also oppose abortion.**

**Hypothesis B states: Those who oppose capital punishment are in favor of abortion.**

Using the **GSS.SAV** data file, do bivariate analyses to determine which hypothesis is more accurate. Remember to request column percentages.

What percentage of those who oppose capital punishment report support­ing abortion?

What percentage of those who are in favor of capital punishment report supporting abortion?

Create two (2) additional crosstabulations with CAPPUN as the indepen­dent (column) variable and ABDEFECT and ABSINGLE as the depen­dent (row) variables.

What is the epsilon value of supporting abortion in the case of a birth defect between those who favor and those who oppose capital punish­ment?

What is the epsilon value of supporting abortion in the case where the mother is single between those who favor and those who oppose capital punishment? Is this bigger or smaller than the above epsilon? What does this mean?

**Part IIIb**

**INDEPENDENT PROJECT**

NAME____________________________

INSTRUCTOR_____________________

DATE___________________________

Using the **GSS.SAV** data file, create several crosstabulations to exam­ine the bivariate relationship between gender (SEX) and attitudes about sexual behavior (PREMARSX, HOMOSEX, and XMOVIE). Interpret the chi-square to determine the existence and statistical significance of the relationships.

What percentage of men believe premarital sex is always wrong?

What percentage of women believe premarital sex is always wrong?

Is this relationship statistically significant? What is the chi-square value?

What percentage of men think homosexuality is not at all wrong?

What percentage of women think homosexuality is not at all wrong?

Write a hypothesis about the influence of gender on having seen an X­-rated movie.

Based on your bivariate analysis, is your hypothesis supported or not supported?

What measure of association is most appropriate with the tables you cre­ated in this independent project? Recreate these crosstabs with that mea­sure of association.

What is the value of the measure of association for the relationship between sex and attitudes toward premarital sex? What is the direction of this relationship? What does that mean?

Part IIIb

**INDEPENDENT PROJECT**

NAME______________________________
INSTRUCTOR_______________________
DATE______________________________

Using the **BINGE.SAV** data file, compare the means and perform a t-test to examine the relationship between gender (GENDER) and the number of drinks needed to get drunk (GETDRUNK).

Who needs, on average, more drinks to get drunk, males or females? What is the mean difference?

Recode GETDRUNK to distinguish between needing five (5) or fewer drinks to get drunk and needing six (6) or more drinks to get drunk. Create a crosstabulation to examine the bivariate relationship between this new variable of getting drunk and gender. Ask for a chi-square and lambda. Compare your results of the crosstab to your results of the t-test and comparison of means.
